# Supplementary material for: Brassinazole Resistant 1 Activity Is Organ-Specific and Genotype-Dependent in Barley Seedlings
Source: MDPI journal article supplement (doi:10.3390/ijms222413572), 2021-12-17
Supplement: s1 [file s1]

# Supplementary Material

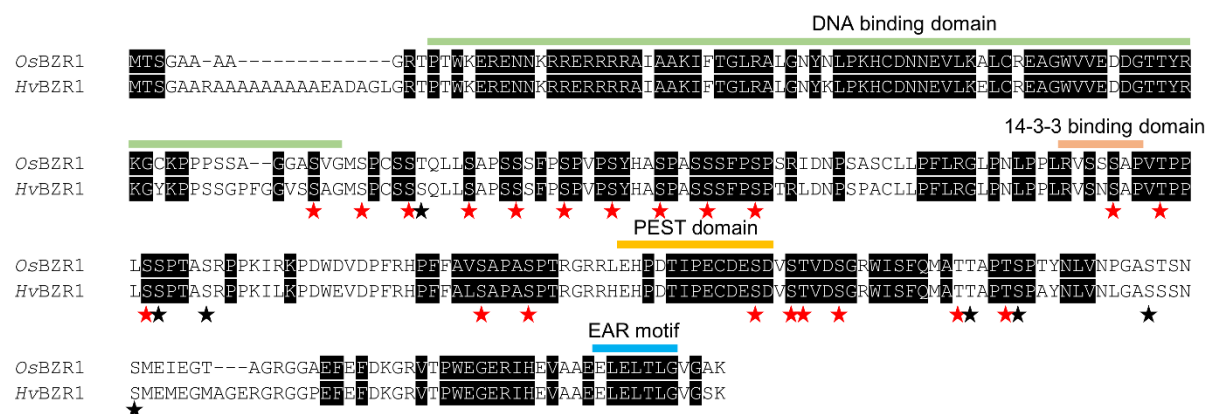

**Figure S1.** The amino acid sequence of *HvBZR1* (BAJ85589.1) and *OsBZR1* (Q7XI96) contains DNA binding domain (green line), 14-3-3 binding domain (brown line), PEST domain (yellow line), and EAR motif (blue line). The red asterisk indicates serine and threonine residues which are phosphorylated in *Arabidopsis thaliana* and *Oryza sativa* (21 sites), the black asterisk indicates other serine and threonine residues which are phosphorylated in *O. sativa* (7 sites). The black background marks regions that are similar between *A. thaliana*, *O. sativa*, and *H. vulgare*.

|               |                                                              |     |
|---------------|--------------------------------------------------------------|-----|
| <i>OsBZR1</i> | ATGACGTCCGGGGCGGCG--GCGGCG-----                              | 18  |
| <i>HvBZR1</i> | ATGACGTCCGGGGCTGCCGGGCGGCGGCGGCGGCGGCTGCGGAGGCGGACGCC        | 60  |
|               | ***** ** *                                                   |     |
| <i>OsBZR1</i> | -----GGGAGGACGCCGACGTGGAAGGAGAGGAGAGACAACAAGAGGCGGGAGCGGCGG  | 78  |
| <i>HvBZR1</i> | GGGCTGGGGCGGACGCCGACGTGGAAGGAGCGGGAGACAACAAGCGCGCGAGCGGCGG   | 120 |
|               | *** *****                                                    |     |
| <i>OsBZR1</i> | CGGCGTGCCATCGCCGCCAAGATCTTACGCGGCTCCGGGCGCTCGGGAACTACAACCTC  | 138 |
| <i>HvBZR1</i> | CGCCGGGCCATCGCCGCCAAGATCTTACCGGCTCCGCGCGCTCGGCAACTACAAGCTC   | 180 |
|               | ** ** ***** *                                                |     |
| <i>OsBZR1</i> | CCCAAGCACTGCGACAACAACGAGGTGCTCAAGGCGCTCTGCCGCGAGGCCGGCTGGGTT | 198 |
| <i>HvBZR1</i> | CCCAAGCACTGCGACAACAACGAGGTGCTCAAGGAGCTCTGCCGCGAGGCCGGATGGGTA | 240 |
|               | *****                                                        |     |
| <i>OsBZR1</i> | GTCGAGGACGACGGCACCACCTACCGCAAGGGATGTAAGCCGCGCCATCGT-----CG   | 252 |
| <i>HvBZR1</i> | GTGGAGGACGACGGCACCACCTACCGCAAGGGATACAAGCCGCGCTCGTCCGGGCCGTTC | 300 |
|               | ** ***** *                                                   |     |
| <i>OsBZR1</i> | GCTGGGGGAGCGTCGGTGGGGATGAGCCCTGCTCGTCAACGCAGCTGCTGAGCGCGCCG  | 312 |
| <i>HvBZR1</i> | GGTGGGTCTCTCGGCGGGCATGAGCCCTGCTCGTCTCGAGCTGCTCAGCGCGCCG      | 360 |
|               | * *****                                                      |     |
| <i>OsBZR1</i> | TCGTCTGCTGTTCCCGAGCCCGGTGCGCTGCTACACGCGAGCCGCGCTCGTCGAGCTTC  | 372 |
| <i>HvBZR1</i> | TCGTCTGCTGTTCCCGAGCCCGGTGCTTCTTCTACACGCGAGCCGCGCTCGTCGAGCTTC | 420 |
|               | ***** *                                                      |     |
| <i>OsBZR1</i> | CCGAGCCCCAGCCGGATCGACAACCCGAGCGCTCCTGCTCCTCCCGTTCTCCGGGGG    | 432 |
| <i>HvBZR1</i> | CCGAGCCCCACGCGCCTCGACAACCCGAGCCCGCTGCTCCTCCCGTTCTCCGTGGC     | 480 |
|               | ***** ** ***** *                                             |     |
| <i>OsBZR1</i> | CTCCCCAACCTCCCGCCGCTCCGCGTCTCCAGCAGCGCGCCGTCACGCCGCCGCTCTCG  | 492 |
| <i>HvBZR1</i> | CTCCCCAACCTGCCCCGCTCCGGGTCTCCAACAGCGCGCCAGTGACGCCGCCGCTCTCG  | 540 |
|               | ***** ** ***** *                                             |     |
| <i>OsBZR1</i> | TCGCCGACGGCGTCGCGCCGCCAAGATCAGGAAGCCGACTGGGACGTCGACCCGTTTC   | 552 |
| <i>HvBZR1</i> | TCGCCGACGGCGTCGCGCCGCCAAGATCCTGAAGCCGACTGGGAGGTCGACCCGTTTC   | 600 |
|               | ***** *****                                                  |     |
| <i>OsBZR1</i> | CGGCACCCCTTCTTCGCGGTCTCCGCGCGGCGAGCCCCACCCGCGGCGCGCCTCGAG    | 612 |
| <i>HvBZR1</i> | CGGCACCCGTTCTTCGCGCTCTCCGCGCGGCGAGCCCCACCCGTGGCGCGGCGACGAG   | 660 |
|               | ***** ***** *                                                |     |
| <i>OsBZR1</i> | CACCCGGACACGATACCGGAGTGCAGCAGTCCGACGTCTCCACGGTGGACTCCGGCCGG  | 672 |
| <i>HvBZR1</i> | CATCCGACACGATACCGGAGTGCAGCAGTCCGACGTCTCCACGGTGGACTCTGGCCGG   | 720 |
|               | ** *****                                                     |     |
| <i>OsBZR1</i> | TGGATCAGCTTCCAGATGGCCACGACGCGCCGACGTGCGCCACCTACAACCTCGTCAAC  | 732 |
| <i>HvBZR1</i> | TGGATCAGCTTCCAGATGGCCACGACGCGCCGACGTCCCGCGGTACAACCTCGTCAAC   | 780 |
|               | ***** *** *                                                  |     |
| <i>OsBZR1</i> | CCGGGCGCCTCCACCTCCAATCCATGGAGATAGAAGGGACGG-----CCGGCCGA      | 783 |
| <i>HvBZR1</i> | CTAGGCGCTCCAGCTCAAATCCATGGAGATGGAGGAATGGCGGGGAGAGGGCCGA      | 840 |
|               | * ***** ** *                                                 |     |
| <i>OsBZR1</i> | GGCGGCGCGGAGTTCGAGTTCGACAAGGGGAGGTTGACGCCATGGGAGGGCGAGAGGATC | 843 |
| <i>HvBZR1</i> | GGCGGCGCGGAATTCGAGTTCGACAAGGGGAGGTTGACGCCATGGGAAGGGGAAGGATC  | 900 |
|               | ***** *****                                                  |     |
| <i>OsBZR1</i> | CACGAGGTCGCCCGGAGGAGCTCGAGCTACGCTCGGCGTCGGCGCGAAATGA         | 897 |
| <i>HvBZR1</i> | CATGAGTCGCCCGGAGGAGCTTGAGCTACGCTCGGCGTCGGCTCAAATGA           | 954 |
|               | ** ***** *                                                   |     |

**Figure S2.** Alignment of the full-length coding sequences of the BZR1 gene for rice (*OsBZR1*, Os07t0580500-01) and barley (*HvBZR1*, AK354370). Asterisk indicates the same nucleotides between plant species.

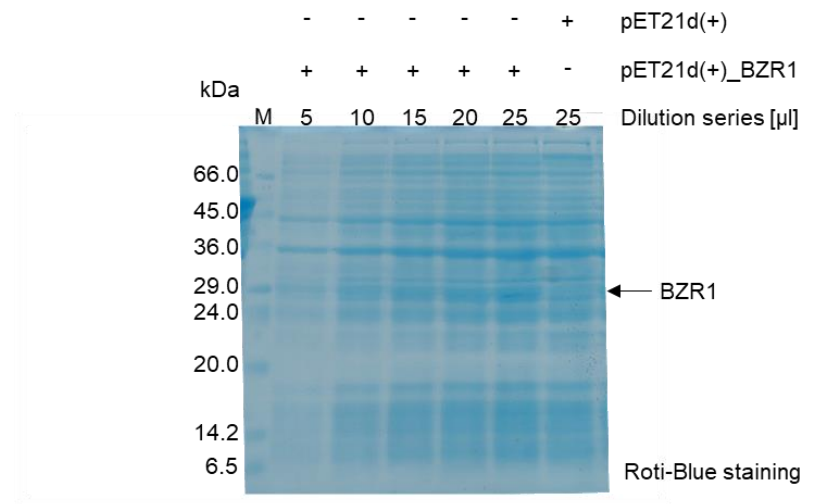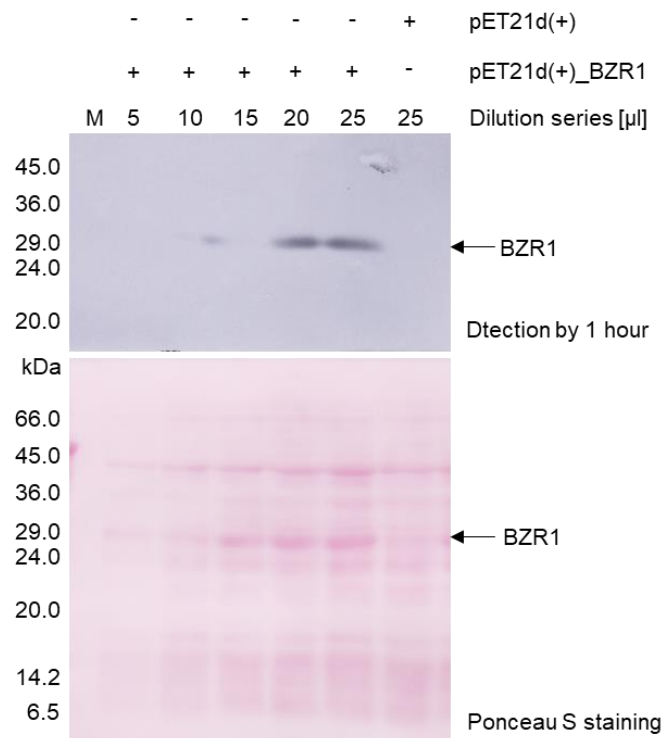

**Figure S3.** Results of Roti-Blue (Roth) staining of polyacrylamide gel after SDS-PAGE. Results of dilution series *E. coli* BL21(DE3) cell lysate with recombinant protein of *HvBZR1* (pET21d(+)\_BZR1) compared to control (pET21d(+)\_empty). M, Sigma Marker wide range, Molecular Weight 6.5-200.0 in kDa (Sigma); red arrow, amplicon about appropriate length.

**Table S1.** List of primers used in Real-Time PCR.

| Gen Name                                                                                                                                                                                                                                               | Orientation | 5'–3' Sequence          | Data Base ID                         | Literature          |
|--------------------------------------------------------------------------------------------------------------------------------------------------------------------------------------------------------------------------------------------------------|-------------|-------------------------|--------------------------------------|---------------------|
| <i>HvDWF4</i>                                                                                                                                                                                                                                          | Forward     | CATCTCCTTGCCCCATCAATC   | NCBI GenBank: DQ832258               | Gruszka et al.2011  |
|                                                                                                                                                                                                                                                        | Reverse     | ATCGAAGTCGTGGACATGGT    |                                      |                     |
| <i>HvBAK1</i>                                                                                                                                                                                                                                          | Forward     | TGCTGCCTTGCTATTTGCTA    | NCBI GenBank: EF216861               | Gruszka et al.2011  |
|                                                                                                                                                                                                                                                        | Reverse     | CTTGCCAAATCCACCTCTTC    |                                      |                     |
| <i>HvBRI1</i>                                                                                                                                                                                                                                          | Forward     | GTCTCTGTCAAGCATTCCCCG   | NCBI GenBank: AB088206               | not published       |
|                                                                                                                                                                                                                                                        | Reverse     | AGCTTCCCAAGCCACGA       |                                      |                     |
| <i>HvBSU1</i>                                                                                                                                                                                                                                          | Forward     | TGGCATCGCGTGAATAGGTT    | NCBI GenBank: AK375108.1             | not published       |
|                                                                                                                                                                                                                                                        | Reverse     | AACAACCTGAGCCTGCTTCCA   |                                      |                     |
| <i>HvGSK1.1</i>                                                                                                                                                                                                                                        | Forward     | CCCTTCTTTGATGAGCTTCG    | Ensemble Plants: HORVU3Hr1G034440.2  | Groszyk et. al.2018 |
|                                                                                                                                                                                                                                                        | Reverse     | CAGGGGAAATGCTCACTTGT    |                                      |                     |
| <i>HvGSK1.2</i>                                                                                                                                                                                                                                        | Forward     | TCTGGGCACACCTACAAGGG    | Ensemble Plants: HORVU5Hr1G117030.1  | Groszyk et. al.2018 |
|                                                                                                                                                                                                                                                        | Reverse     | TGGAGACCAGGTCCACTGCT    |                                      |                     |
| <i>HvGSK1.3</i>                                                                                                                                                                                                                                        | Forward     | ACGAGATGGGCAATATGAG     | Ensemble Plants: HORVU1Hr1G016490.9  | Groszyk et. al.2018 |
|                                                                                                                                                                                                                                                        | Reverse     | GTTCCAAATGACCCATGACC    |                                      |                     |
| <i>HvGSK2.1</i>                                                                                                                                                                                                                                        | Forward     | AGTGCTTGGGAGACTGGAGAGAC | Ensemble Plants: HORVU3Hr1G026020.1  | Groszyk et. al.2018 |
|                                                                                                                                                                                                                                                        | Reverse     | GTGCTTCAGAGAGACGACATTG  |                                      |                     |
| <i>HvGSK2.2</i>                                                                                                                                                                                                                                        | Forward     | CACCAACTCGGGAGGAAATA    | Ensemble Plants: MLOC_68311.2        | Groszyk et. al.2018 |
|                                                                                                                                                                                                                                                        | Reverse     | GCTCCCGTAGCTCATCAAAG    |                                      |                     |
| <i>HvGSK3.1</i>                                                                                                                                                                                                                                        | Forward     | AAAGTGGCGTTGATCAGTTGG   | Ensemble Plants: HORVU1Hr1G048580.7  | Groszyk et. al.2018 |
|                                                                                                                                                                                                                                                        | Reverse     | CAGGGATGAGCTTTTATCTGAGG |                                      |                     |
| <i>HvGSK4.1</i>                                                                                                                                                                                                                                        | Forward     | GCGAGAAGGCAGAACCTGTT    | Ensemble Plants: HORVU5Hr1G119790.18 | Groszyk et. al.2018 |
|                                                                                                                                                                                                                                                        | Reverse     | TGTCACCCACCCACACAAAG    |                                      |                     |
| <i>HvBZR1</i>                                                                                                                                                                                                                                          | Forward     | CCCGTTCTTCGCCCTCTC      | NCBI GenBank: AJ508228               | not published       |
|                                                                                                                                                                                                                                                        | Reverse     | ATCTGGAAGCTGATCCACCG    |                                      |                     |
| <i>HvGAPDH</i>                                                                                                                                                                                                                                         | Forward     | TCAAGCAAGGACTGGAGAGG    | NCBI GenBank: X60343                 | Gruszka et al.2011  |
|                                                                                                                                                                                                                                                        | Reverse     | ACACATCCACAGTGGGAACC    |                                      |                     |
| <i>HvARF</i>                                                                                                                                                                                                                                           | Forward     | GCTCTCCAACAACATTGCCAAC  | NCBI GenBank: AJ508228               | Groszyk et. al.2018 |
|                                                                                                                                                                                                                                                        | Reverse     | GCTTCTGCCTGTACATACGC    |                                      |                     |
| Groszyk J, Yanushevskaya Y, Zielezinski A, Nadolska-Orczyk A, Karlowski WM, Orczyk W (2018) Annotation and pro-<br>filing of barley GLYCOGEN SYNTHASE3/Shaggy-like genes indicated shift in organ-preferential expression. PLoS<br>One 13(6): e0199364 |             |                         |                                      |                     |
| Gruszka D, Szarejko I, Maluszynski M (2011) Identification of barley DWARF gene involved in brassinosteroid syn-<br>thesis. Plant Growth Regulation 65(2): 343-358                                                                                     |             |                         |                                      |                     |
